# Supplementary material for: Selectively electrolyzing CO2 to ethylene by a Cu–Cu2O/rGO catalyst derived from copper hydroxide nanostrands/graphene oxide nanosheets
Source: Royal Society of Chemistry journal article supplement (doi:10.1039/d4ra07259f), 2024-01-01
Supplement: d4ra07259f1.pdf [file d4ra07259f1.pdf]

## Electronic Supplementary Information

### **Selectively electrolyzing CO<sub>2</sub> to ethylene by Cu-Cu<sub>2</sub>O/rGO catalyst derived from copper hydroxide nanostrands/graphene oxide**

Chenxiang Peng,<sup>a,b</sup> Bing Yao,<sup>b,c</sup> Lei Wang,<sup>b,c</sup> Xinyi Wan,<sup>\*b,c</sup>

<sup>a</sup>Department of Chemistry, Zhejiang University, Hangzhou 310058, P. R. China.

<sup>b</sup>State Key Laboratory of Silicon and Advanced Semiconductor Materials, School of Materials Science and Engineering, Zhejiang University, P. R. China.

E-mail: 11826060@zju.edu.cn

<sup>c</sup>Wenzhou Key Laboratory of Novel Optoelectronic and Nanomaterials, Institute of Wenzhou, Zhejiang University, Wenzhou 325006, P. R. China.

**The file includes:**

- 1. Figures S1-S13.**
- 2. Tables S1-S3.**

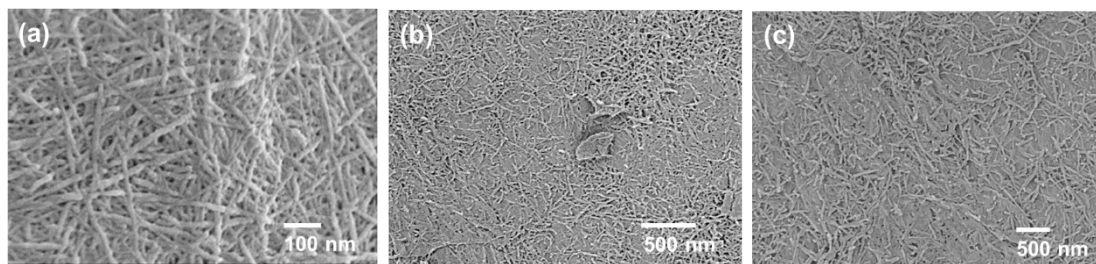

**Fig. S1.** SEM images of (a) Copper hydroxide nanostrands (CHNs); (b) S9 CNHS/GO before electrochemical reduction; (c) S11 CNHS/GO before electrochemical reduction.

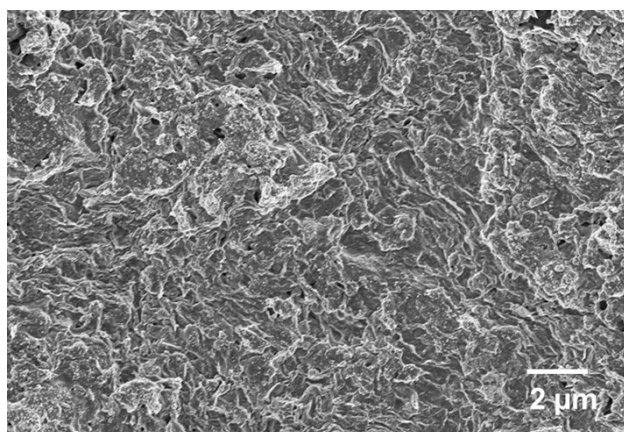

**Fig. S2.** SEM images of S10 Cu-Cu<sub>2</sub>O/rGO in large scale.

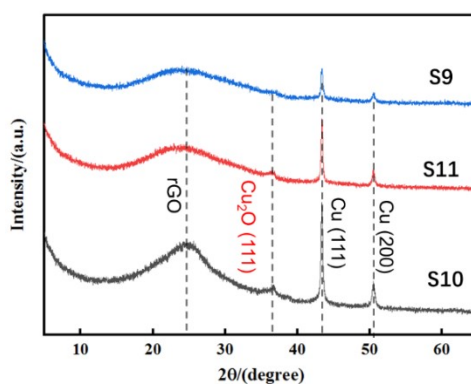

**Fig. S3.** XRD patterns of S9-S11 synthesized by in situ electrochemical reduction.

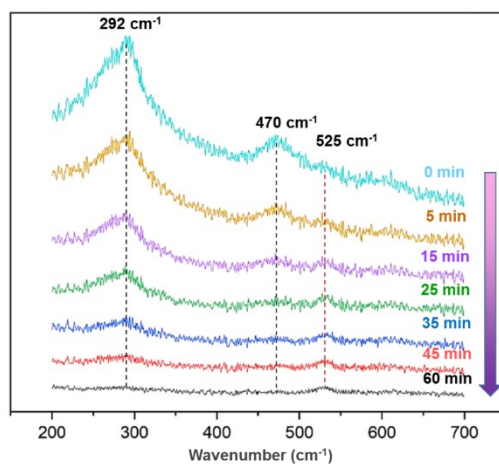

**Fig. S4.** The in-situ Raman spectra of the CHNs/GO electrochemical reduction process in the wavenumber range from 200 to 700  $\text{cm}^{-1}$ .

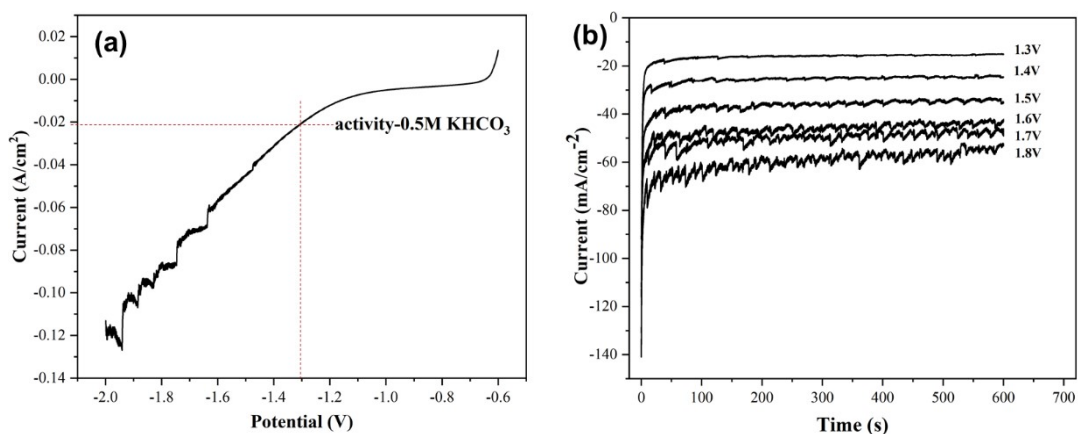

**Fig. S5.** (a) The activity measurement of S10 by potential scanning from -0.6 to -2.0 V vs. SHE; (b) the chronoamperometry curves of S10 at different potentials vs. SHE.

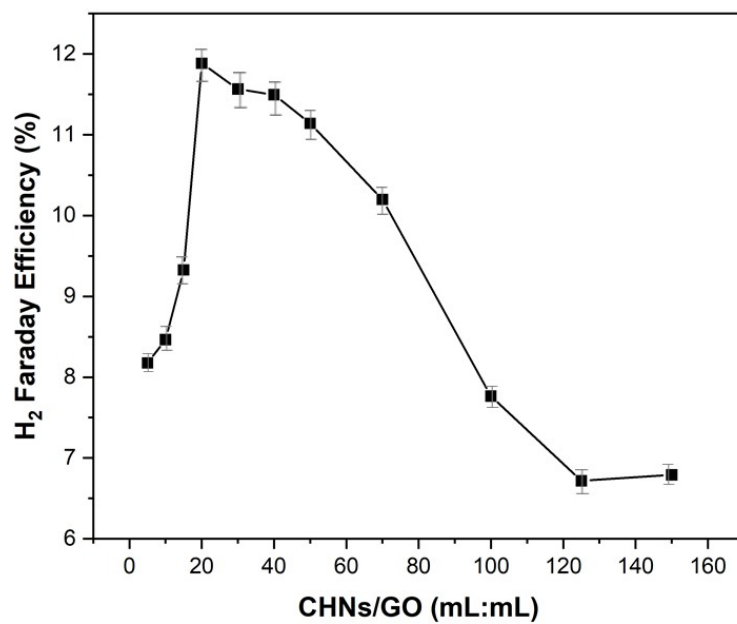

**Fig. S6.** FE of H<sub>2</sub> for CO<sub>2</sub> ERR from S1 to S11 samples at -1.3 V vs. SHE.

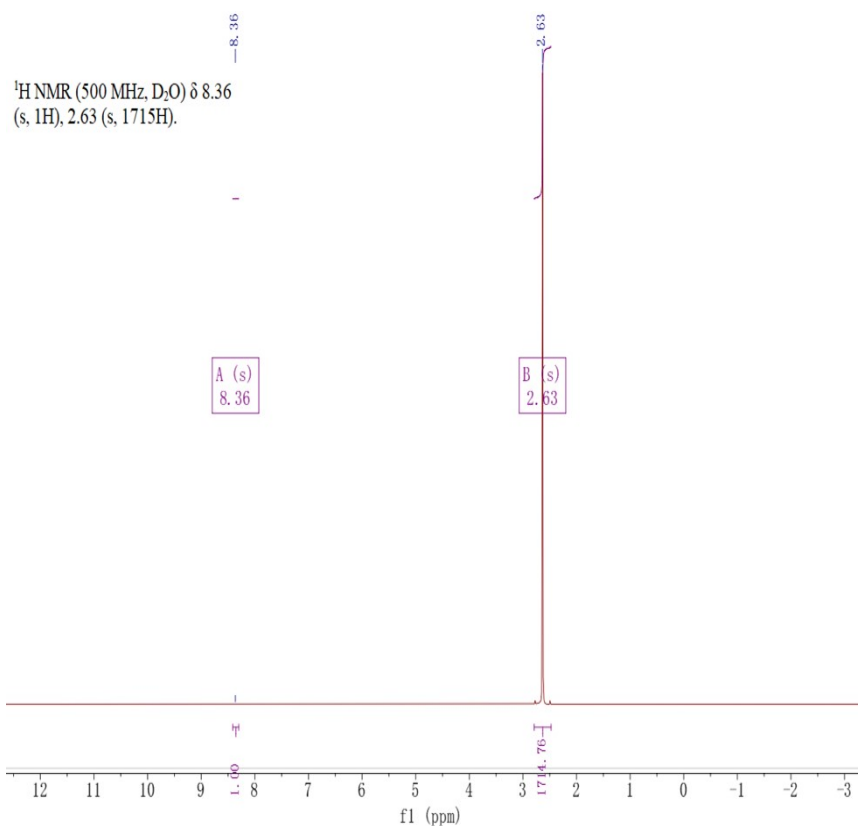

**Fig. S7.** NMR spectrum recorded from the liquid products after  $\text{CO}_2$  ERR by using S10 catalyst at -1.3 V vs. SHE.

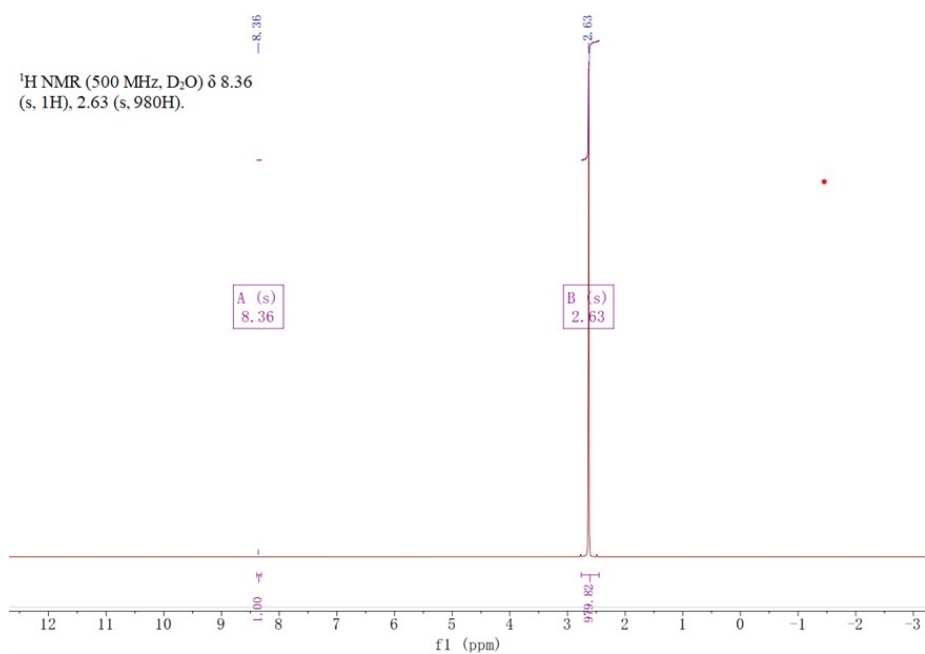

**Fig. S8.** NMR spectrum recorded from the liquid products after  $\text{CO}_2$  ERR by using S10 catalyst at -1.4 V vs. SHE.

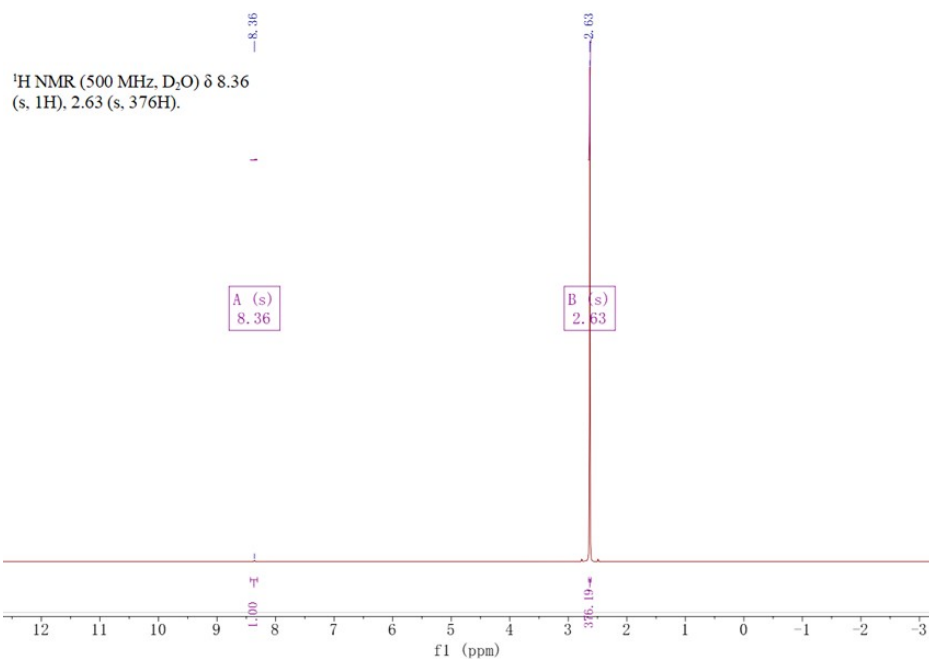

**Fig. S9.** NMR spectrum recorded from the liquid products after CO<sub>2</sub> ERR by using S10 catalyst at -1.5 V vs. SHE.

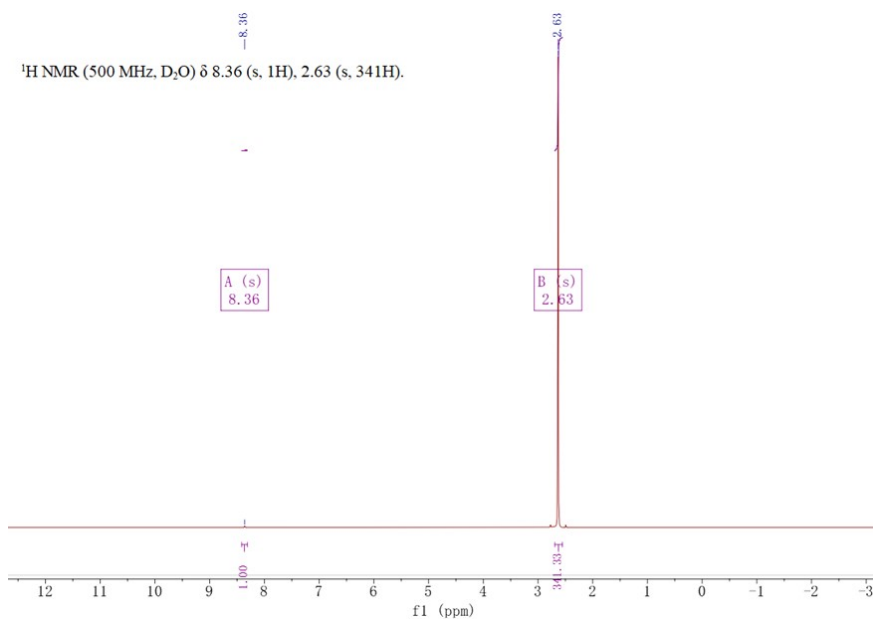

**Fig. S10.** NMR spectrum recorded from the liquid products after CO<sub>2</sub> ERR by using S10 catalyst at -1.6 V vs. SHE.

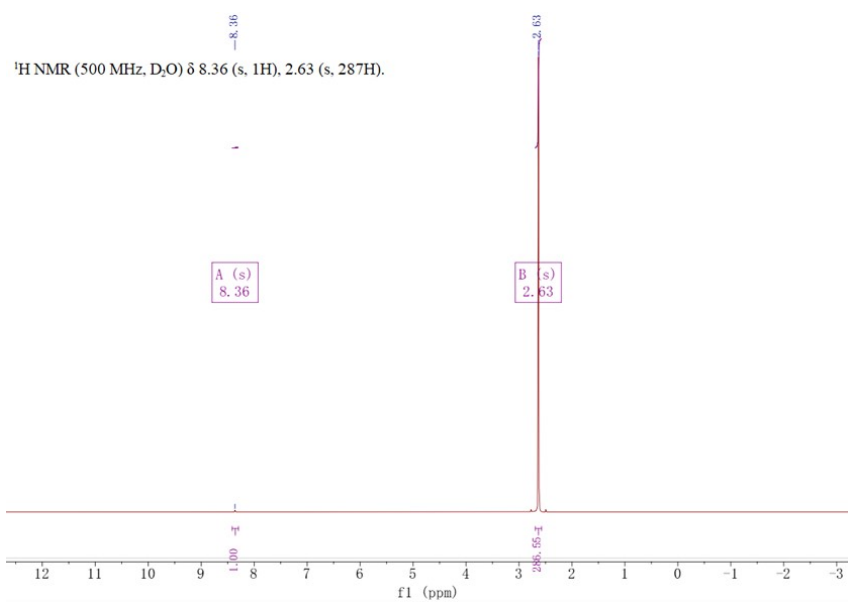

**Fig. S11.** NMR spectrum recorded from the liquid products after  $\text{CO}_2$  ERR by using S10 catalyst at -1.7 V vs. SHE.

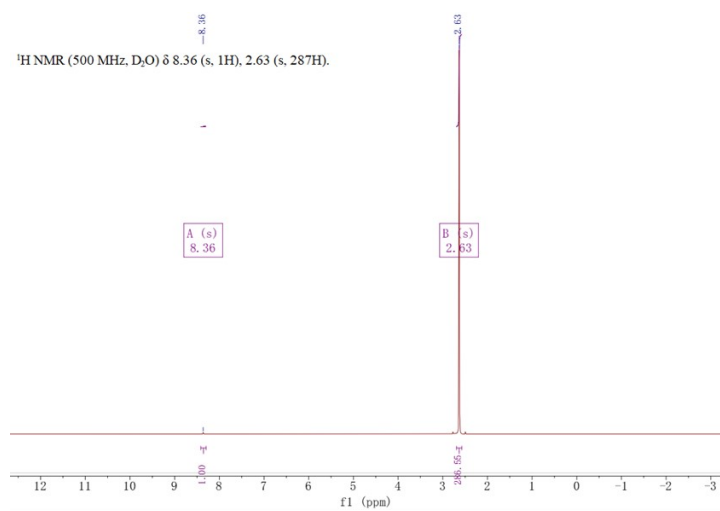

**Fig. S12.** NMR spectrum recorded from the liquid products after  $\text{CO}_2$  ERR by using S10 catalyst at -1.8 V vs. SHE.



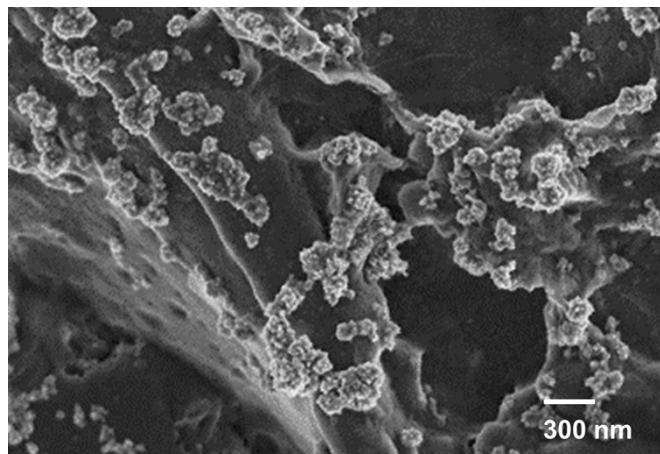

**Fig. S13.** SEM image of S10 after catalytic CO<sub>2</sub> ERR for 50 hours at -1.3 V vs. SHE.

**Table S1.** The CHNs and GO volume ratio for different samples.

| Sample | CHNs溶液 (ml) | GO (2mg/ml) |
|--------|-------------|-------------|
| S1     | 5           | 1           |
| S2     | 10          | 1           |
| S3     | 15          | 1           |
| S4     | 20          | 1           |
| S5     | 30          | 1           |
| S6     | 40          | 1           |
| S7     | 50          | 1           |
| S8     | 70          | 1           |
| S9     | 100         | 1           |
| S10    | 125         | 1           |
| S11    | 150         | 1           |

**Table S2.** The FE of the gas products from CO<sub>2</sub> ERR at different potential by using S10 as catalyst.

| vs. SHE | C <sub>2</sub> H <sub>4</sub> | C <sub>2</sub> H <sub>6</sub> | H <sub>2</sub> | CO   |
|---------|-------------------------------|-------------------------------|----------------|------|
| -1.3 V  | 55.4%                         | 37.6%                         | 6.7%           | 0.3% |
| -1.4 V  | 68.2%                         | 10.2%                         | 20.5%          | 1.1% |
| -1.5 V  | 43.2%                         | 2.9%                          | 51.2%          | 2.7% |
| -1.6 V  | 17.8%                         | 1.2%                          | 77.5%          | 3.7% |
| -1.7 V  | 4.6%                          | 0.7%                          | 91%            | 3.7% |
| -1.8 V  | 1.8%                          | 0                             | 95.9%          | 2.3% |

**Table S3.** The Faraday efficiency of C<sub>2</sub>H<sub>4</sub> and total C<sub>2</sub> through the CO<sub>2</sub> ERR catalyzed by Cu<sup>0</sup>-Cu<sup>+</sup> based catalyst reported recently and this work.

| Electrolyzer | Catalyst                                                         | Electrolyte             | Potential (V)              | Current density (mA/cm <sup>2</sup> ) | Stability (h) | C <sub>2</sub> H <sub>4</sub> (FE %) | C <sub>2</sub> total (FE %) | Ref.      |
|--------------|------------------------------------------------------------------|-------------------------|----------------------------|---------------------------------------|---------------|--------------------------------------|-----------------------------|-----------|
| Flow cell    | OH <sup>-</sup> modified 25 nm Cu NPs/graphite/carbon black/PTFE | 7 M KOH                 | -0.55 vs RHE               | 275                                   | 150           | 70                                   | 83%                         | 2         |
| H cell       | Tens nm Cu-CuO <sub>x</sub> /carbon black                        | 0.1 M KHCO <sub>3</sub> | -1.3 vs RHE                | 20                                    | 9             | 53                                   | 74                          | 4         |
| Flow cell    | CuO-Cu <sub>2</sub> O/carbon black                               | 1 M KHCO <sub>3</sub>   | -1.6 vs RHE                | 160                                   | 12            | 46                                   | -                           | 7         |
| H cell       | 250-300 nm Cu-CuO <sub>x</sub> -I/copper foil                    | 0.1 M KHCO <sub>3</sub> | -0.9 vs RHE                | 31.2                                  | 22            | 47                                   | 80                          | 9         |
| H cell       | Cu <sub>x</sub> @Cu <sub>2</sub> O nano convex/carbon paper      | 0.1 M KHCO <sub>3</sub> | -1.2 vs RHE                | 14.8                                  | 12            | 59.3                                 | 90.5                        | 11        |
| Flow cell    | Cu-Cu <sup>+</sup> on CuSiO <sub>3</sub> /carbon black           | 0.1 M KHCO <sub>3</sub> | -1.1 vs RHE                | 20.2                                  | 6             | 51.8                                 | 70                          | 12        |
| Flow cell    | C <sub>60</sub> -Cu-Cu <sup>+</sup> composite                    | 1.0 M KOH               | -1.4 vs RHE                | 366                                   | 12            | ~35                                  | 61                          | 14        |
| Flow cell    | Cu/Cu <sub>2</sub> O NPs/Carbon nanotubes                        | 2 M KOH                 | -                          | 800                                   | 3             | 45                                   | 79                          | 17        |
| Flow cell    | OH <sup>-</sup> modified Cu NPs/carbon black                     | 0.1 M KHCO <sub>3</sub> | -3.4 cell voltage          | 316                                   | 35            | 55.6                                 | -                           | 22        |
| Flow cell    | NH <sub>3</sub> Cl modified Cu/Cu <sub>2</sub> O/carbon black    | 0.1 M KHCO <sub>3</sub> | -                          | 200                                   | 50            | ~10                                  | ~75                         | 24        |
| Flow cell    | Poly ionic liquid/Cu-Cu <sub>2</sub> O hybrids                   | 1 M KOH                 | -0.85 vs RHE               | 304                                   | 10            | ~44                                  | 76.1                        | 35        |
| Flow cell    | Cu-Cu <sub>2</sub> O/rGO                                         | 1 M KHCO <sub>3</sub>   | -1.3 vs SHE<br>-1.4 vs SHE | 16<br>26                              | 50<br>50      | 55.4<br>68.2                         | 93<br>78.4                  | This work |
